# Supplementary material for: Generation of Dynamic Concentration Profile Using A Microfluidic Device Integrating Pneumatic Microvalves
Source: Biosensors (Basel). 2022 Oct 13;12(10):868. doi: 10.3390/bios12100868 (PMC9599525; doi:10.3390/bios12100868)
Supplement: Supplementary file 1 [file biosensors-12-00868-s001.zip › Program_2_Pressurecalculator.m]

clc,clear;  
%input = inputdlg(prompt,dlg_title,num_lines,defAns)
prompt={'Channel 1:','Channel 2:','Channel 3:','Channel 4:','Inlet buffer flow rate (uL/min):'};  %input parameter numbers
words='Enter a profile ratio (<1)';  %title
input=inputdlg(prompt,words,[1 50;1 50;1 50;1 50;1 50],{'0.8','0.6','0.4','0.2','1'});  %preset parameters
input=cellfun(@str2double,input);  %transfer cell to be matrix
C(1)=input(1);  %Concentration ratio of channel 1
C(2)=input(2);  %Concentration ratio of channel 2
C(3)=input(3);  %Concentration ratio of channel 3
C(4)=input(4);  %Concentration ratio of channel 4
Qin1=input(5);  %Inlet flow rate(uL/min), the outlet flow rates are the same
%% parameters for calculation
HS=1.66666667e-11;  %transfer number from uL/min to m^3/s
Qin=Qin1*HS;  %inlet pressure
Q=zeros(4,4);  %build a zeros matrix for flow rate
X=1/(1-C(1));  %X is the dilute time in each junction
Q(1,2)=X*Qin;  %the inlet flow rate in first junction, equal the flow rate sum of sample and first buffer
N=4;  %Branch channel number
N1=N-1;  %the number for channels without mixing
%%  channel size parameters
L1=3e-3;  %channel length before mixing junction
L2=20e-3;  %channel length for mixing junction    
L3=20e-3;  %channel length between two stages
L4(1)=7.17e-3;  %channel length for first outlet channel
L4(2)=13.6e-3;  %channel length for second outlet channel
L4(3)=8.04e-3;  %channel length for third outlet channel
L4(4)=4.7e-3;  %channel length for last outlet channel
Lv=300e-6; %valve length
w=200e-6;  %channel width for channels except valve region
wv=50e-6;  %valve width
h=50e-6;  %channel height for all part
Lc=10e-3;  %channel length for concentration channel
wc=1e-3;  %channel width for concentration channel
%% flow rate calculation
u=1.01e-3;  %dynamic viscosity
A=w*h;  Av=wv*h;  Ac=wc*h;  %cross section area
P=2*(w+h);  Pv=2*(wv+h);  Pc=2*(wc+h);  %cross section perimeter
rh=2*A/P;  rhv=2*Av/Pv;  rhc=2*Ac/Pc;  %hydraulic radius
R=(8*u*Lv)/(Av*rhv^2); %flow resistance 
%% flow rate in each part
Q(:,1)=Qin; %flow rate in each buffer inlet,0.02uL/min
for j=1:N1
    Q(j,3)=(Qin*C(j+1))/(C(j)-C(j+1));  %flow rate in each shunt channels, the last output doesn't have shunt
end
for k=2:N
    Q(k,2)=Qin+Q(k-1,3);  %flow rate in each mixing channels, the first mixing region doesn't need to calculate
end
for l=1:N1
    Q(l,4)=Q(l,2)-Q(l,3);  %flow rate in each output
end
Q(N,4)=Q(N,2); %in last junction, output flow rate is mixing flow rate
%% flow resistance calculation
R=zeros(N,7);  %build a zeros matrix for flow rate
R(1:N,2)=(12*u*L2)/(w*h^3*(1-0.63*h/w));  %flow resistance in mixing region
R(1:N1,3)=(12*u*L3)/(w*h^3*(1-0.63*h/w));  %flow resistance in shunt channel
R(N,4)=(8*u*(L4(4)+Lv))/((rhv^2)*Av);  %flow resistance before concentration channel in last output channel
R(N,5)=(12*u*Lc)/(wc*h^3*(1-0.63*h/wc));  %flow resistance in concentration channel
R(N,6)=R(N,4)+R(N,5);  %flow resistance in whole last output channel
for m=N1:-1:1
    R(m,6)=(Q(m,3)*R(m,3)+Q(m+1,4)*R(m+1,6)+Q(m+1,2)*R(m+1,2))/Q(m,4);  %flow resistance in each output channel
    R(m,5)=R(N,5);
    R(m,4)=R(m,6)-R(m,5);
end    
R(:,1)=(12*u*L1)/(w*h^3*(1-0.63*h/w));  %flow resistance before mixing junction
for i=1:1:N
    R(i,7)=(8*u*L4(i))/((rhv^2)*Av);  %flow resistance before concentration channel without valve region
    Rv(i)=R(i,4)-R(i,7);    
end
%% Calculate the pressures
a=6e11;
b=3.3e-3;
P=log(Rv/a)/b;
f=msgbox({'Channel 1 (mabr):';num2str(P(1));'Channel 2 (mabr):';num2str(P(2));'Channel 3 (mabr):';num2str(P(3));'Channel 4 (mabr):';num2str(P(4))});
